# Supplementary material
Source: Springer Nature journal article supplement (https://www.springermedizin.de/resource/supplementary/13023_2011_370_MOESM5_ESM.pdf/9642342)

**Fam 795:**

**M1: *CUBN*: c.127C>T p.R43X**

**M2: *CUBN*: c.9340G>A p.G311S**

**M3: *GUCY2D*: c.1499C>T p.P500L**

**M4: *TRPM1*: c.3904T>C p.C1302R**

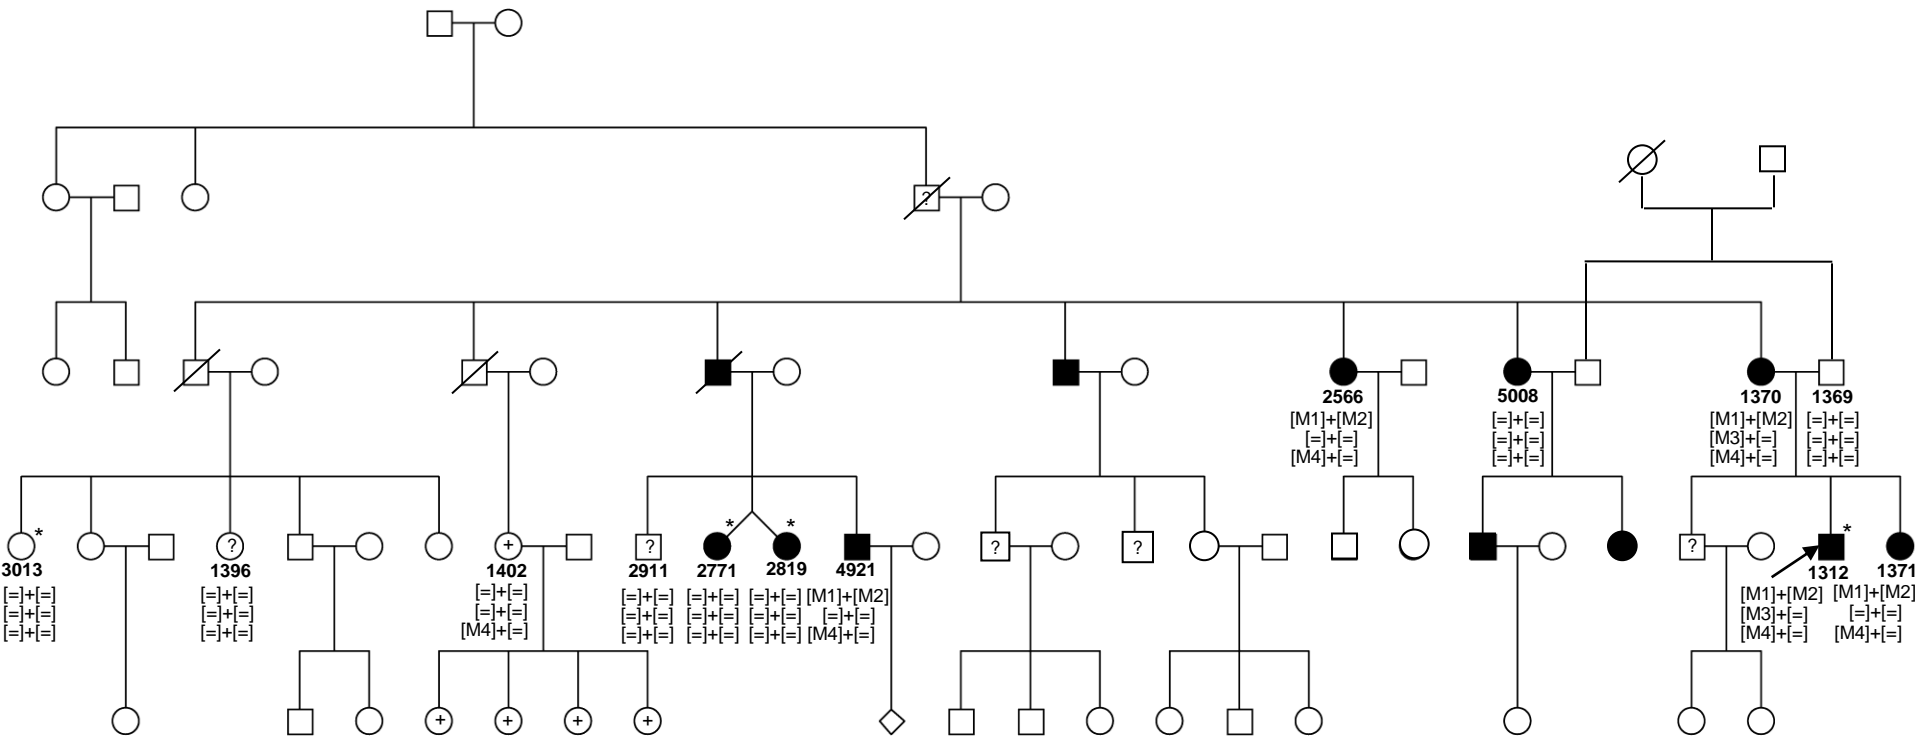

Supplement: MOESM5 [file 9642342]
